# Supplementary material for: Optimization of Phlorizin Extraction from Annurca Apple Tree Leaves Using Response Surface Methodology
Source: MDPI journal article supplement (doi:10.3390/antiox11101933), 2022-09-28
Supplement: s1 [file s1]

Supplementary material

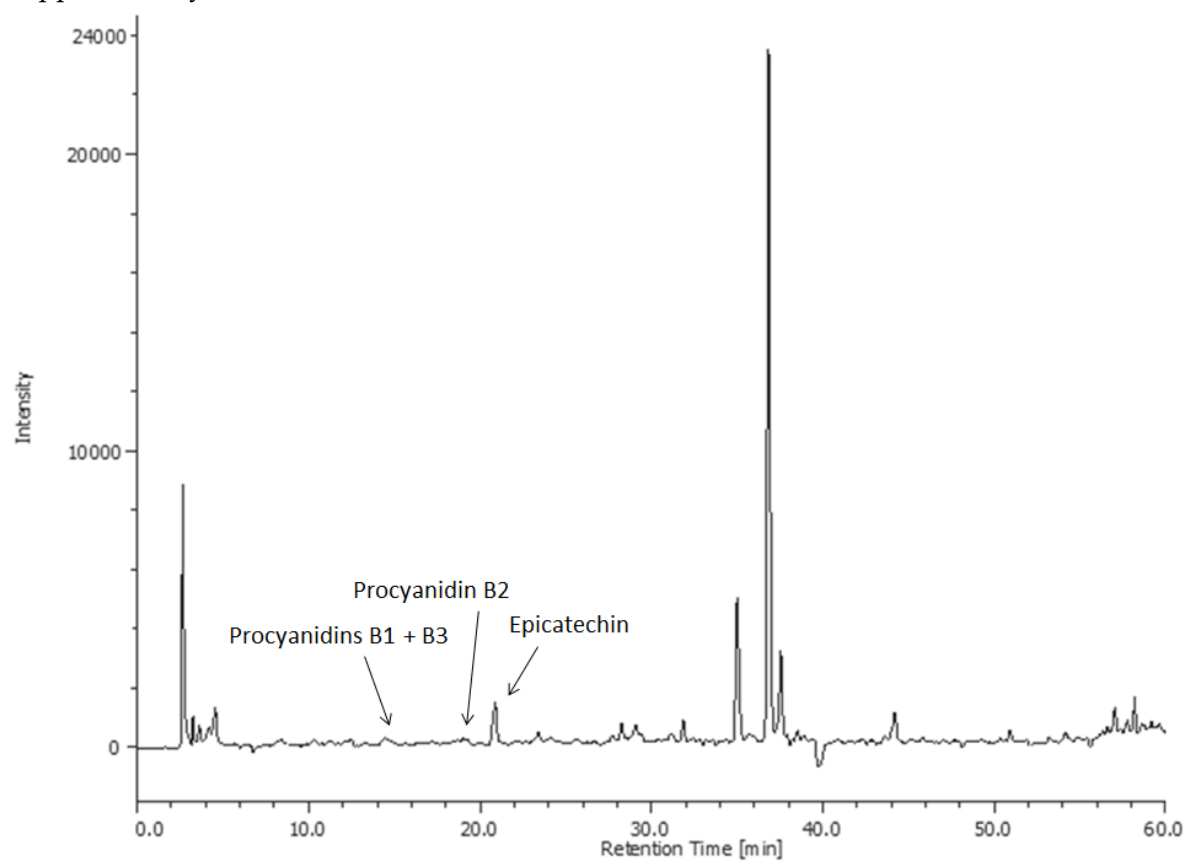

Figure S1. HPLC-FLD chromatogram of OAALE extract.

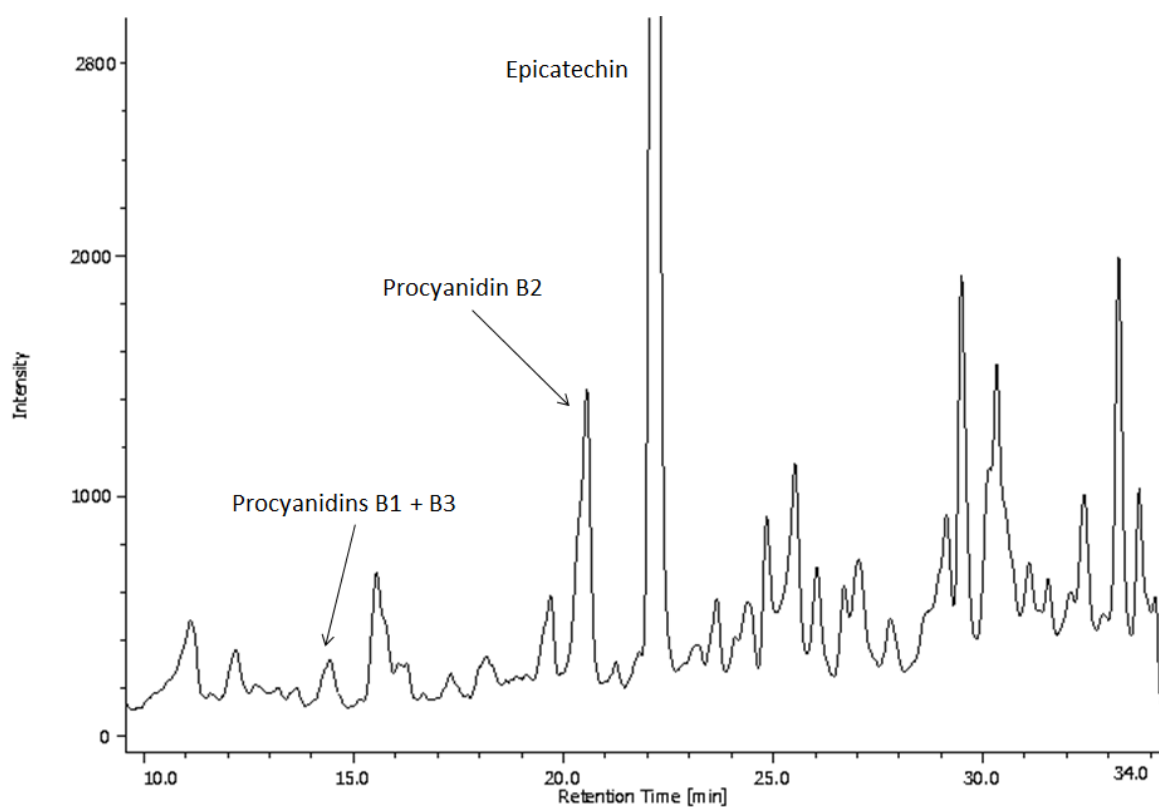

Figure S2. Zoomed area of HPLC-FLD chromatogram of OAALE extract.

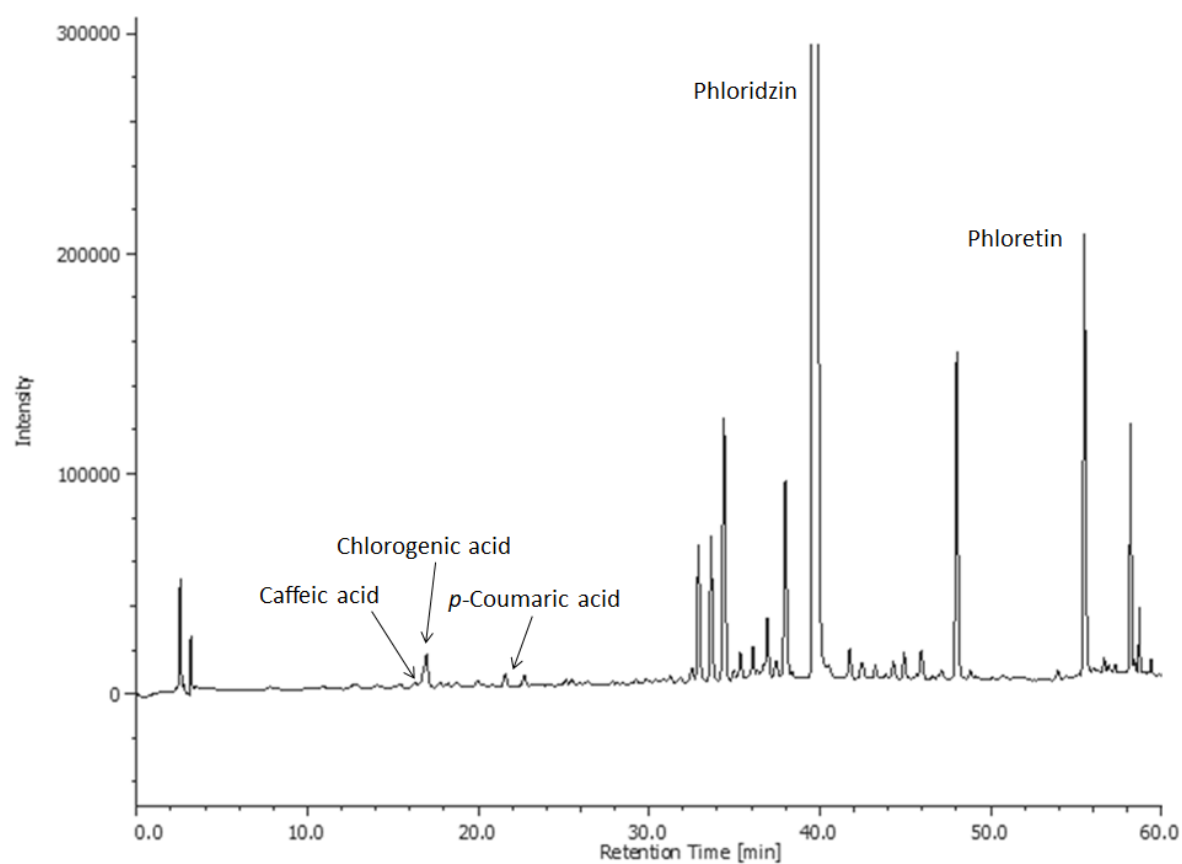

Figure S3. HPLC-DAD chromatogram at 280 nm of OAALE extract.

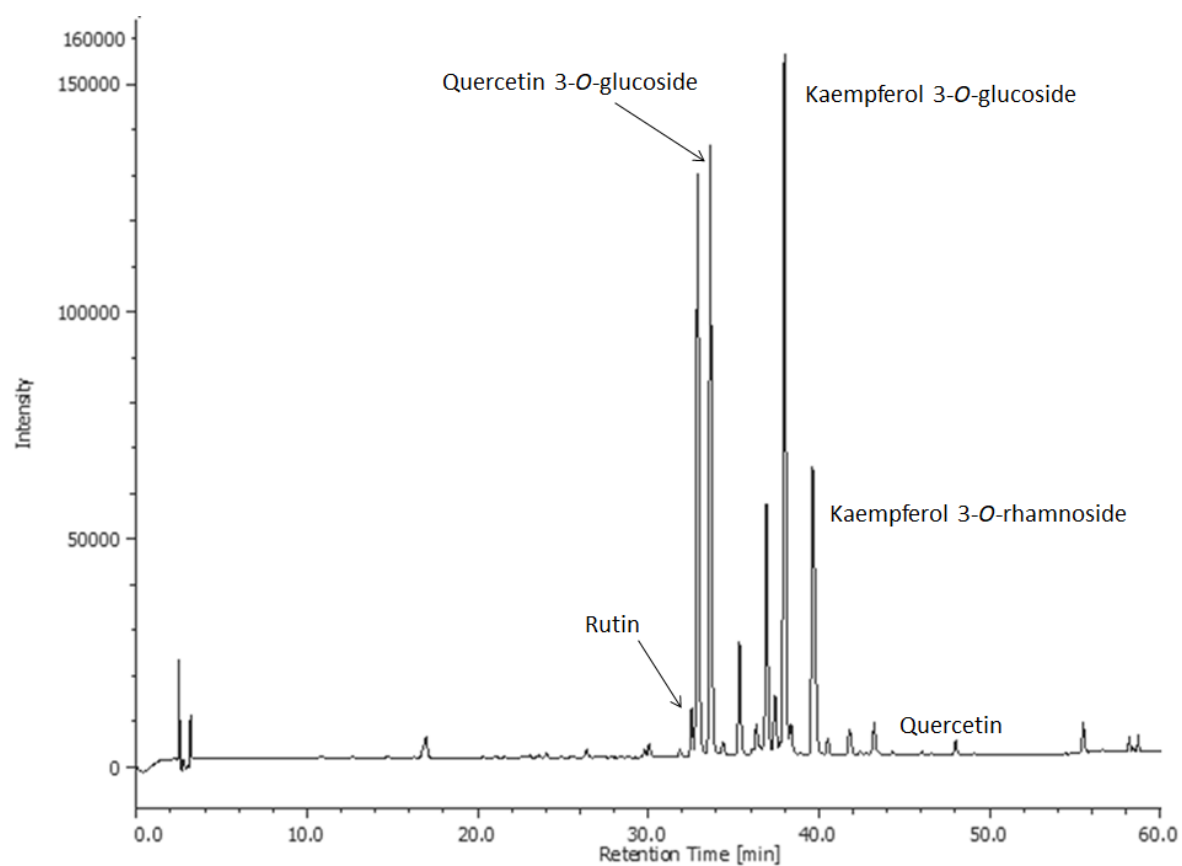

Figure S4. HPLC-DAD chromatogram at 360 nm of OAALE extract.
